# Supplementary material for: Development and Validation of Targeted Gene Sequencing Panel Based Companion Diagnostic for Korean Patients with Solid Tumors
Source: MDPI journal article supplement (doi:10.3390/cancers13205112), 2021-10-12
Supplement: s1 [file s1]

**Supplementary Table S1.** Specificity of Korean CDX panel results with KRAS direct sequencing samples.

| KRAS variant status | Sample ID | Variant calling     | Variant Statistics |            | Sample Statistics |                      |
|---------------------|-----------|---------------------|--------------------|------------|-------------------|----------------------|
|                     |           |                     | Alt count*         | Ref count* | Mean Depth        | On target cover rate |
| Wild type           | FFPE 1    | Negative            |                    |            | 1186.0            | 0.99                 |
|                     | FFPE 4    | Negative            |                    |            | 786.6             | 0.99                 |
|                     | FFPE 6    | Negative            |                    |            | 2050.3            | 0.99                 |
|                     | FFPE 7    | Negative            |                    |            | 1220.7            | 0.99                 |
|                     | FFPE 8    | Negative            |                    |            | 2848.7            | 0.99                 |
|                     | FFPE 10   | Negative            |                    |            | 2500.4            | 0.99                 |
|                     | FFPE 11   | Negative            |                    |            | 1451.7            | 0.99                 |
|                     | FFPE 24   | Negative            |                    |            | 1427.0            | 0.99                 |
|                     | FFPE 26   | Negative            |                    |            | 1165.4            | 0.99                 |
|                     | FFPE 27   | Negative            |                    |            | 594.7             | 0.99                 |
|                     | FFPE 33   | Negative            |                    |            | 589.2             | 0.99                 |
|                     | FFPE 34   | Negative            |                    |            | 1979.6            | 0.99                 |
|                     | FFPE 37   | Negative            |                    |            | 1112.3            | 0.99                 |
|                     | FFPE 38   | Negative            |                    |            | 2406.2            | 0.99                 |
|                     | FFPE 64   | Negative            |                    |            | 1530.6            | 0.99                 |
|                     | FFPE 68   | Negative            |                    |            | 1066.9            | 0.99                 |
|                     | FFPE 69   | Negative            |                    |            | 1136.6            | 0.99                 |
|                     | FFPE 70   | Negative            |                    |            | 2012.7            | 0.98                 |
|                     | FFPE 76   | Negative            |                    |            | 1659.9            | 0.99                 |
|                     | FFPE 78   | Negative            |                    |            | 1332.9            | 0.99                 |
|                     | FFPE 79   | Negative            |                    |            | 1497.8            | 0.99                 |
|                     | FFPE 86   | Negative            |                    |            | 1841.1            | 0.99                 |
|                     | FFPE 88   | Negative            |                    |            | 1220.1            | 0.99                 |
|                     | FFPE 96   | Negative            |                    |            | 1686.3            | 0.99                 |
|                     | FFPE 97   | Negative            |                    |            | 2014.6            | 0.99                 |
|                     | FFPE 99   | Negative            |                    |            | 2913.1            | 0.99                 |
|                     | FFPE 103  | Negative            |                    |            | 1936.9            | 0.99                 |
|                     | FFPE 105  | Negative            |                    |            | 2922.0            | 1.00                 |
|                     | FFPE 117  | Negative            |                    |            | 3431.9            | 0.99                 |
|                     | FFPE 125  | Negative            |                    |            | 3176.0            | 0.99                 |
|                     | FFPE 21   | Positive (Gly13Asp) | 164                | 1,271      | 929.5             | 0.99                 |
|                     | FFPE 28   | Positive (Gly12Asp) | 45                 | 524        | 801.5             | 0.98                 |
|                     | FFPE 36   | Positive (Gly12Asp) | 71                 | 1,110      | 1100.2            | 0.99                 |
|                     | FFPE 71   | Positive (Gly32Asp) | 27                 | 666        | 1138.1            | 0.99                 |
