# Supplementary figures and images for: Development and Validation of Targeted Gene Sequencing Panel Based Companion Diagnostic for Korean Patients with Solid Tumors
Source: MDPI journal article supplement (doi:10.3390/cancers13205112), 2021-10-12

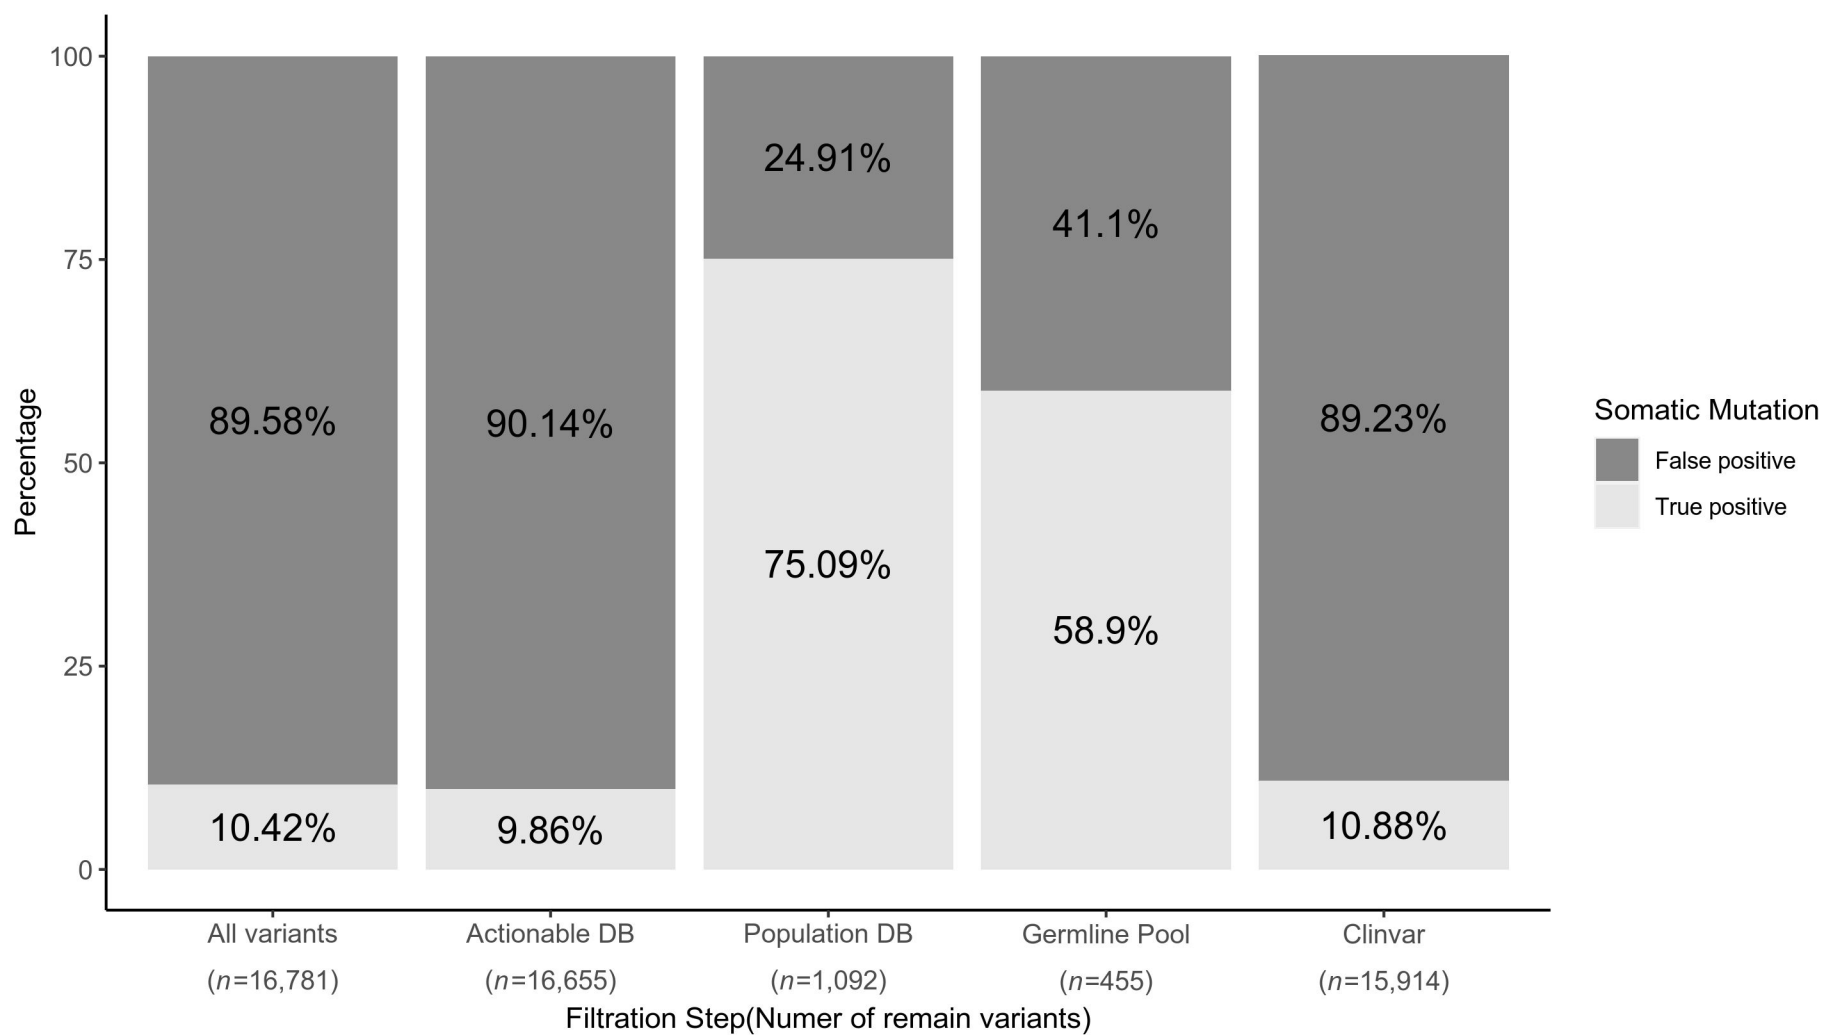

Supplement: s1 [file s1]

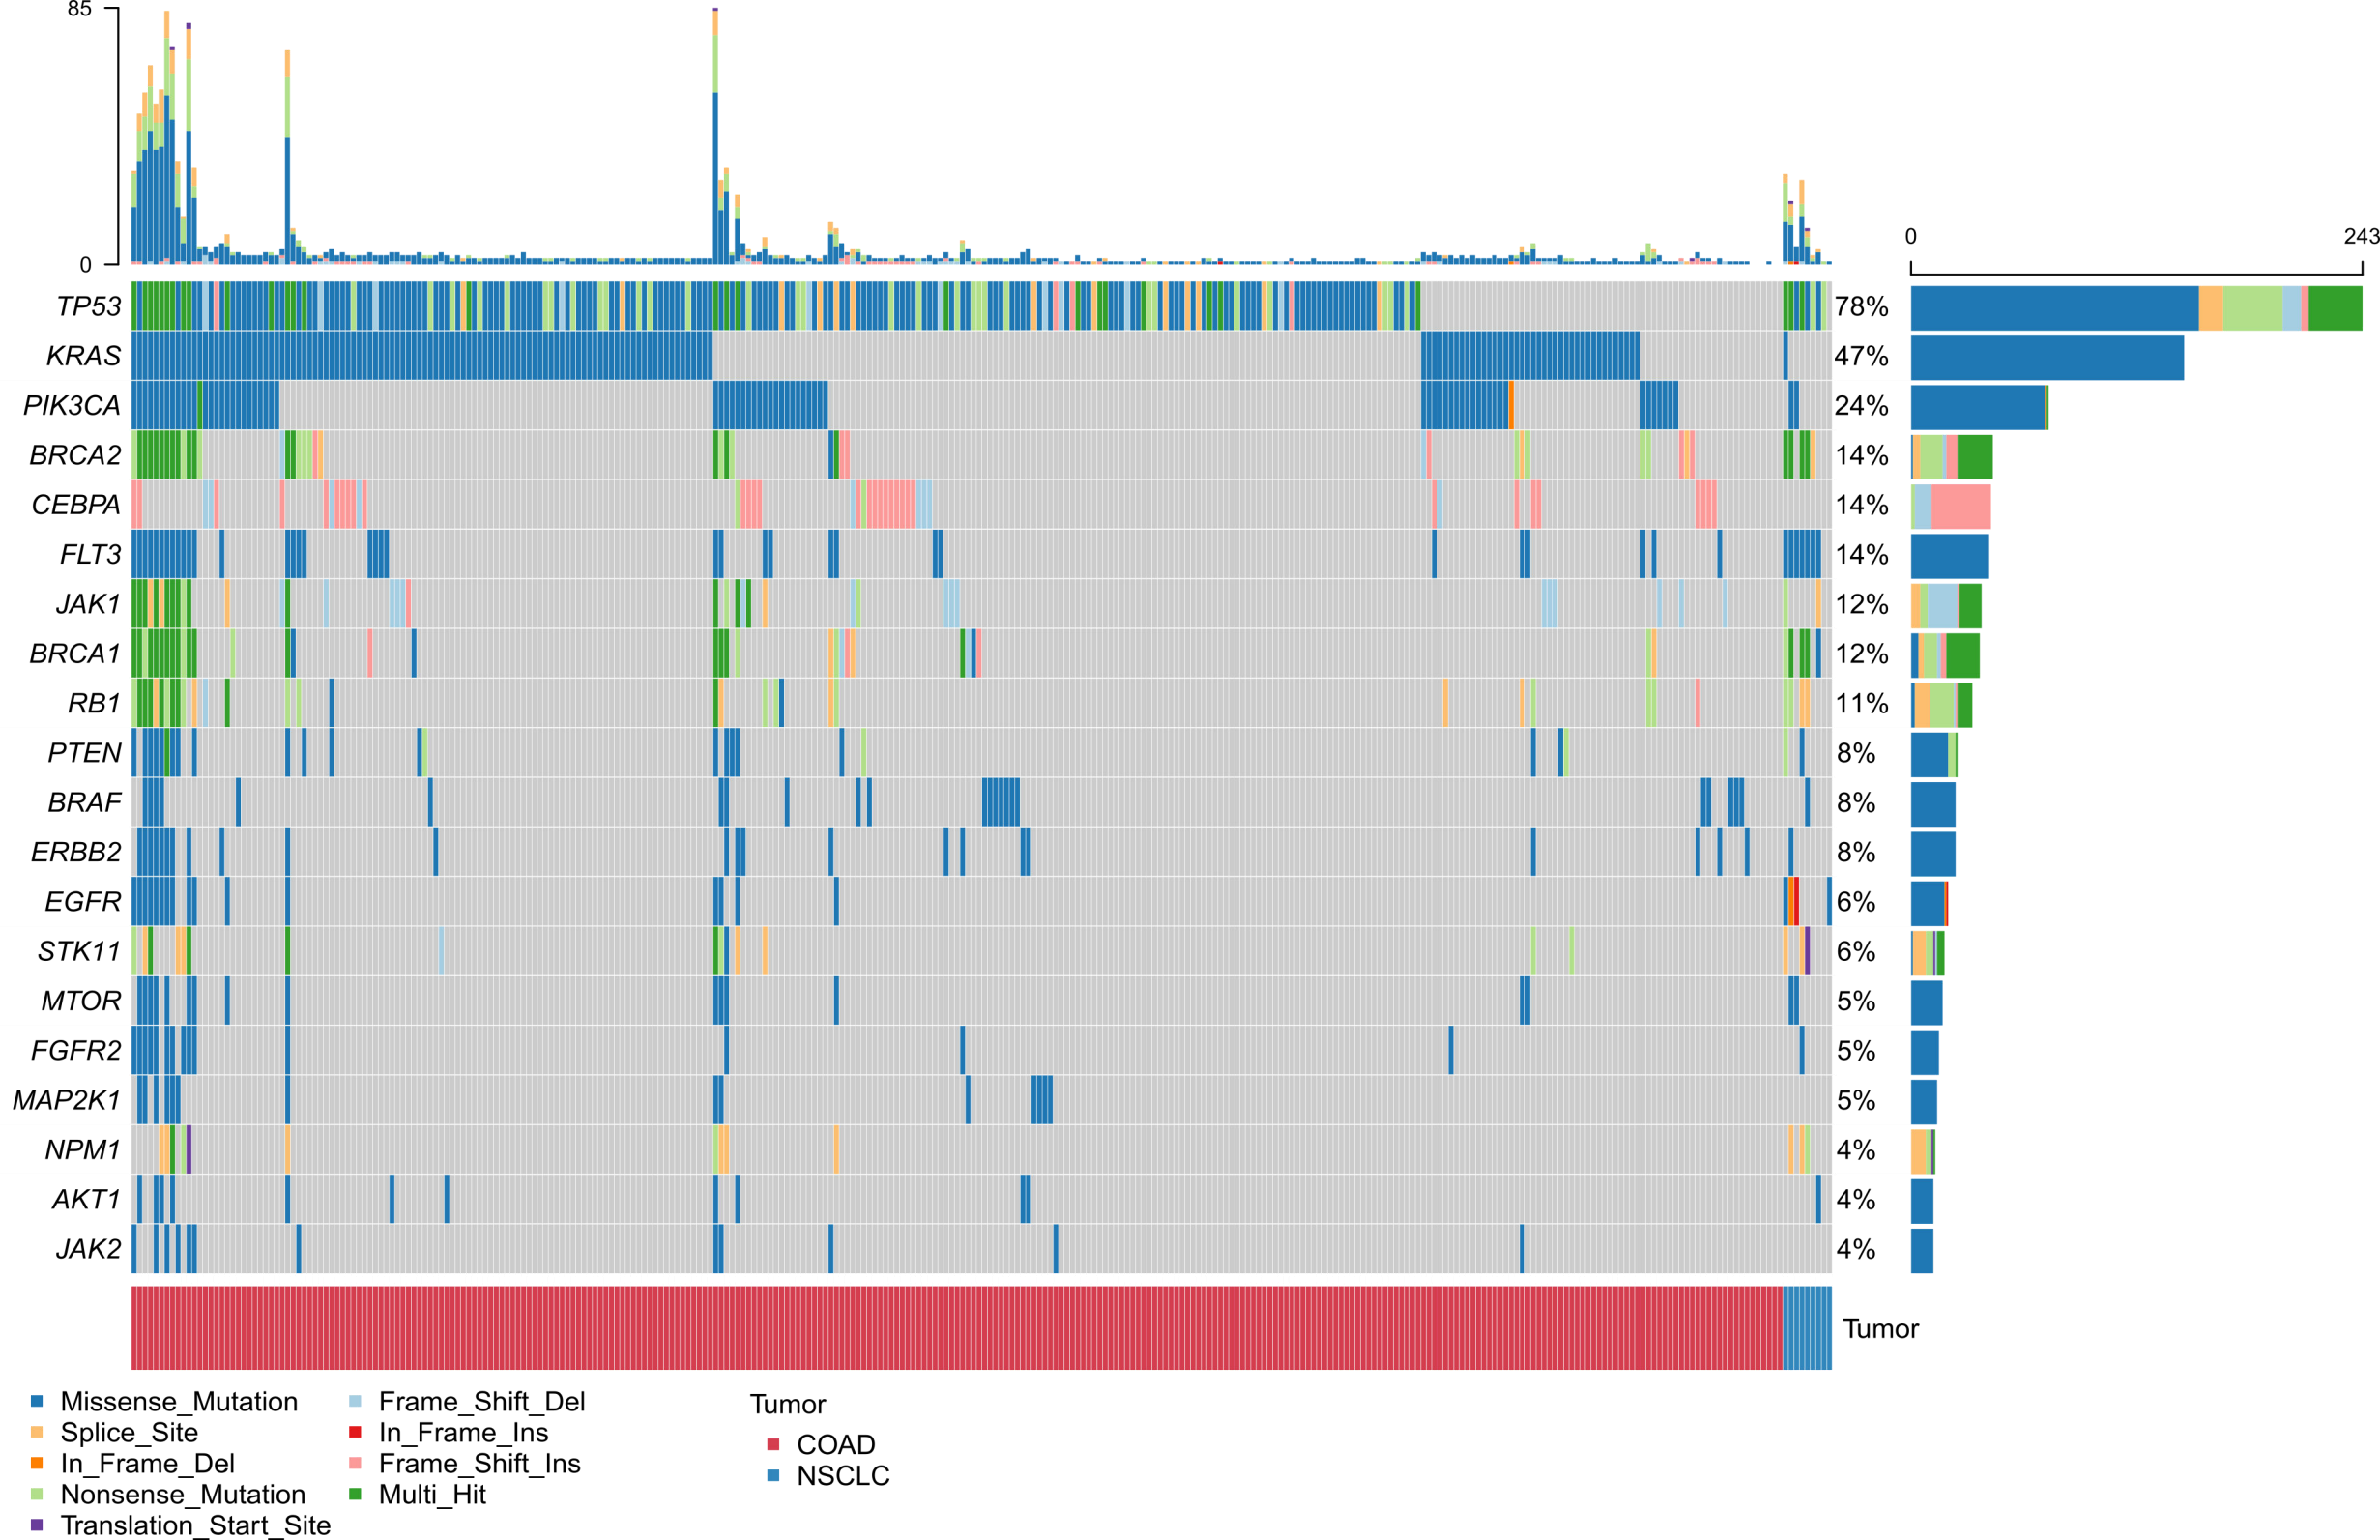

Supplement: s1 [file s1]

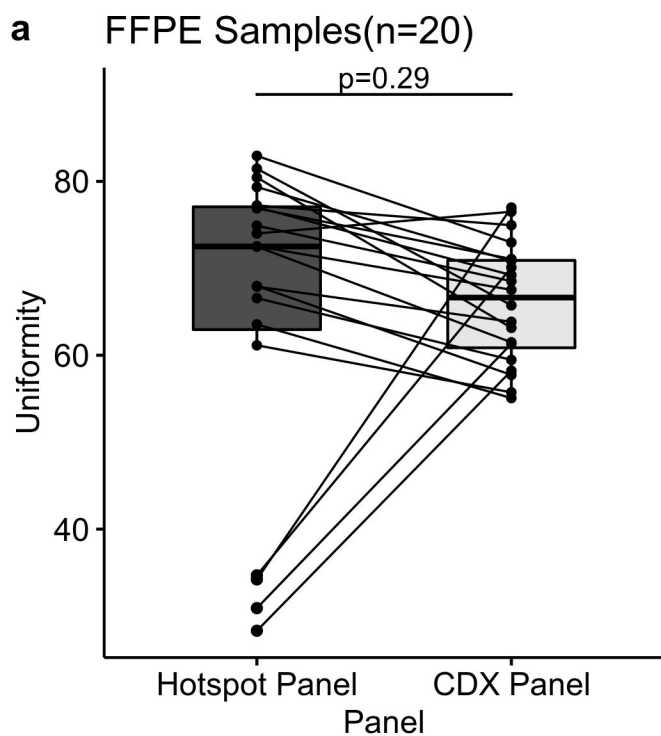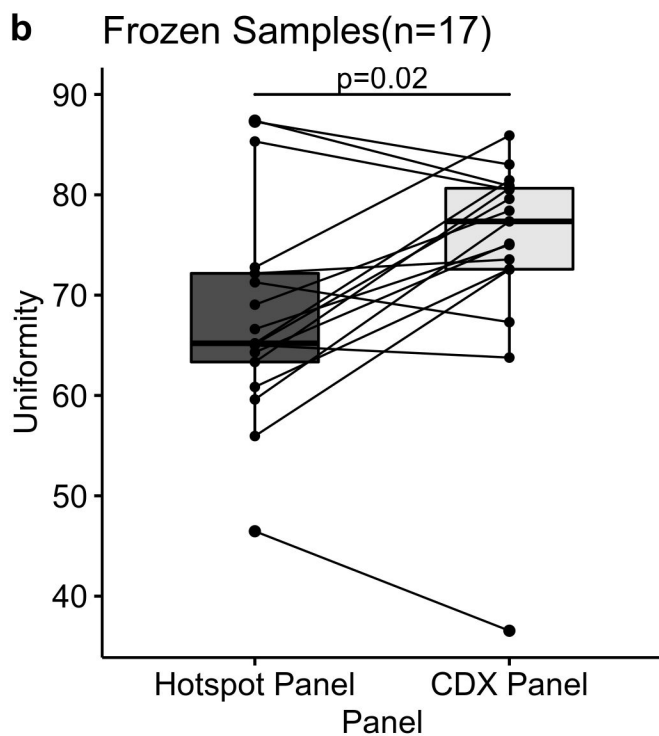

Supplement: s1 [file s1]
